# Supplementary material for: CTCF-Dependent Chromatin Bias Constitutes Transient Epigenetic Memory of the Mother at the H19-Igf2 Imprinting Control Region in Prospermatogonia
Source: PubMed Central journal article supplement (PMC2991272; doi:10.1371/journal.pgen.1001224), 2010-11-24
Supplement: pgen.1001224.s006.pdf [file pgen.1001224.s006.pdf]

**A**

MEF 129 X CS

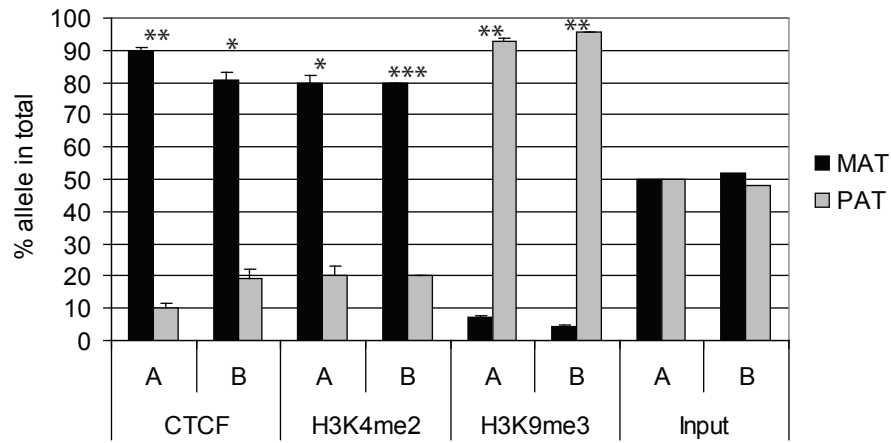

**B**

Nonspecific IgG

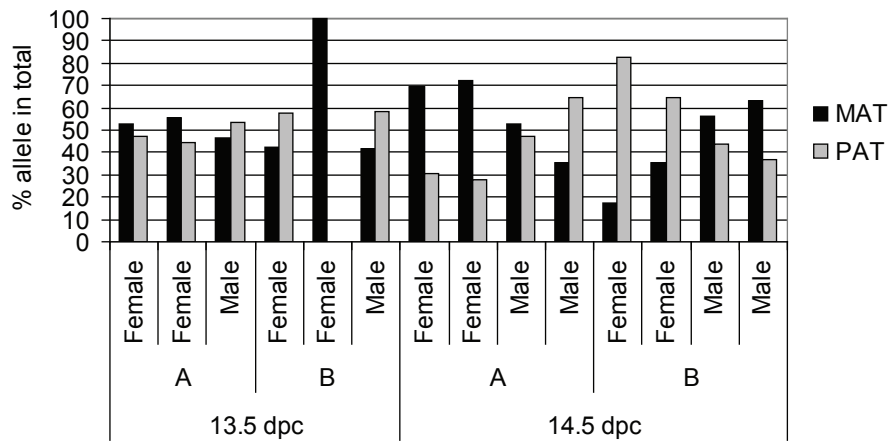

**C**

Input 14.5 dpc

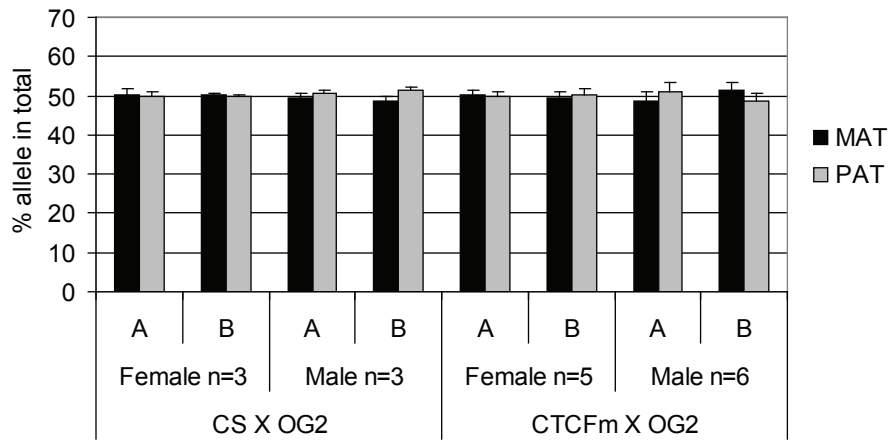

Figure S6 Lee et al.
