# Supplementary material for: CTCF-Dependent Chromatin Bias Constitutes Transient Epigenetic Memory of the Mother at the H19-Igf2 Imprinting Control Region in Prospermatogonia
Source: PubMed Central journal article supplement (PMC2991272; doi:10.1371/journal.pgen.1001224), 2010-11-24
Supplement: pgen.1001224.s007.pdf [file pgen.1001224.s007.pdf]

CTCF 14.5 dpc

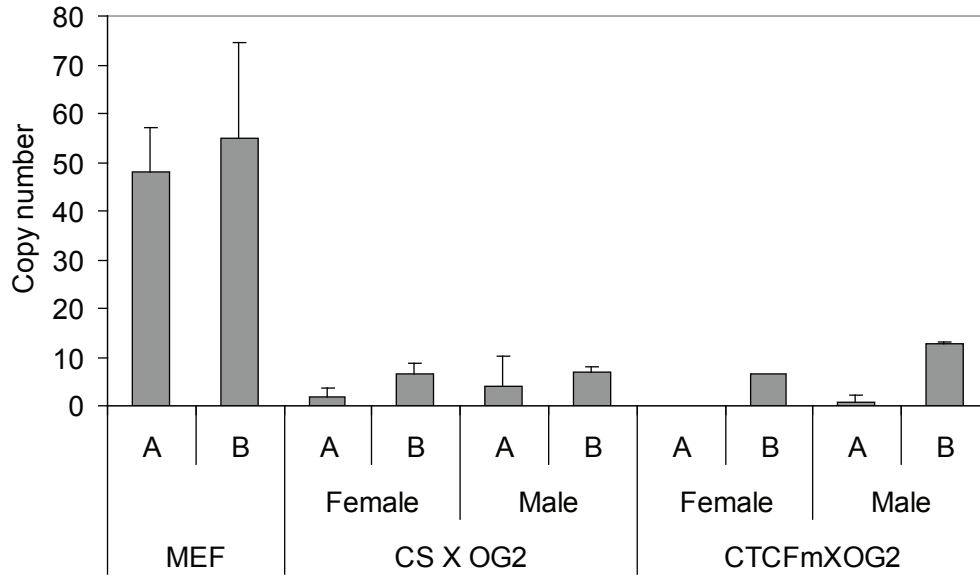

Figure S7 Lee et al.
