# Supplementary material for: CTCF-Dependent Chromatin Bias Constitutes Transient Epigenetic Memory of the Mother at the H19-Igf2 Imprinting Control Region in Prospermatogonia
Source: PubMed Central journal article supplement (PMC2991272; doi:10.1371/journal.pgen.1001224), 2010-11-24
Supplement: pgen.1001224.s009.pdf [file pgen.1001224.s009.pdf]

### H3K4me2 Region A

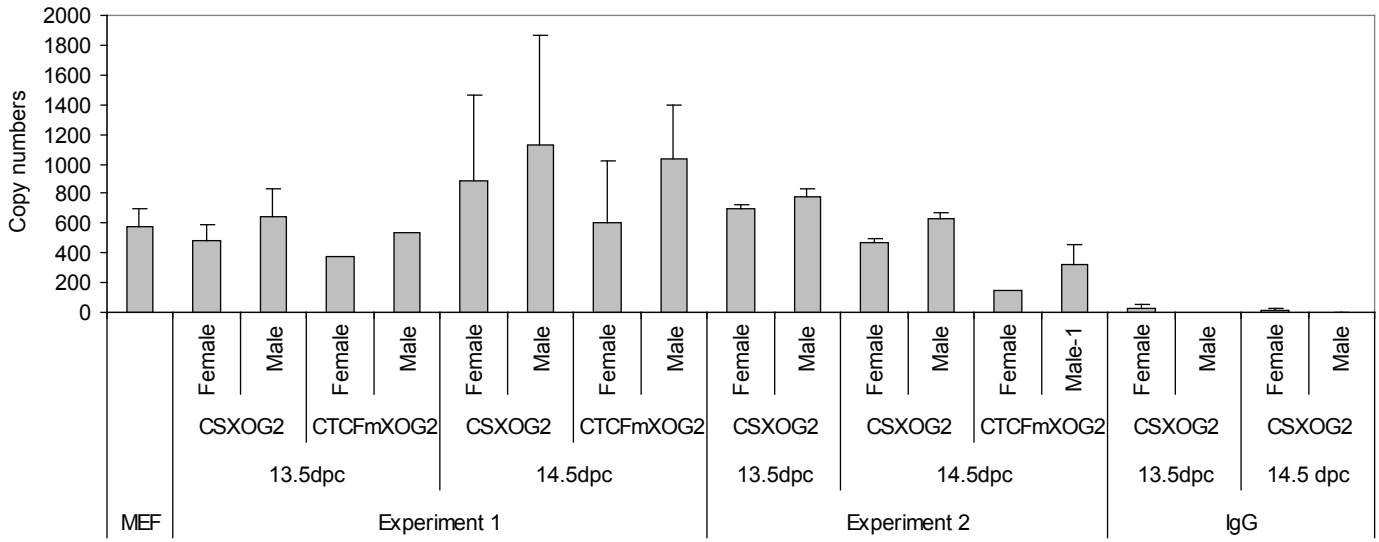

### H3K4me2 Region B

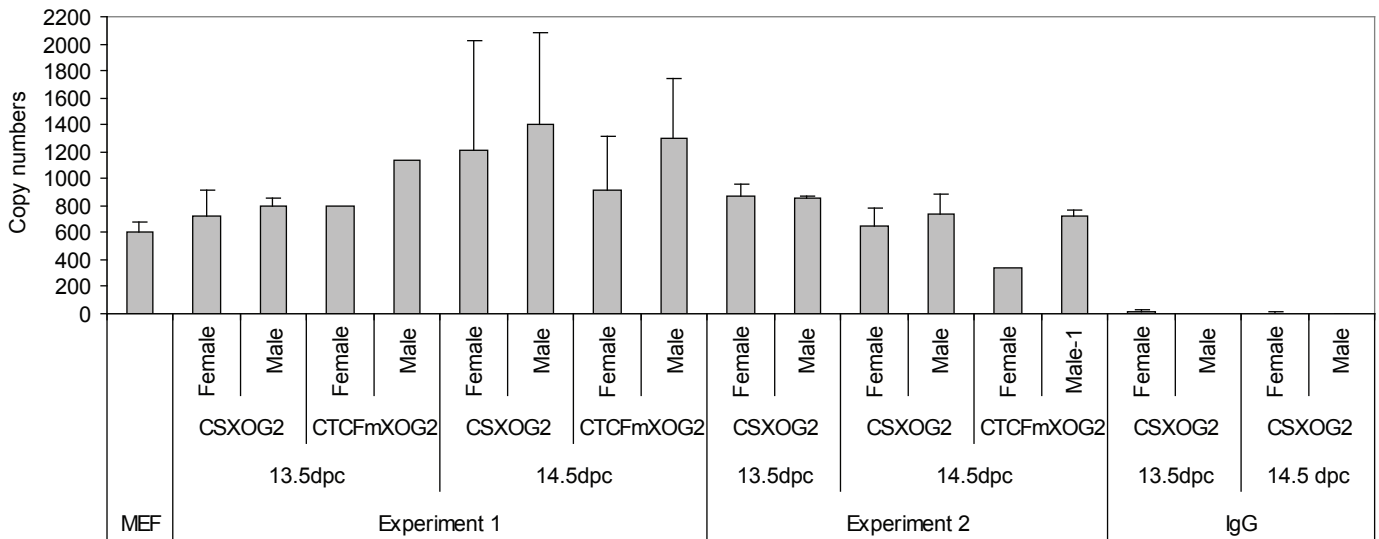

Figure S9 Lee et al.
